# Supplementary material for: Detection of exogenous sugars in pineapple juice using compound-specific stable hydrogen isotope analysis
Source: PubMed Central journal article supplement (PMC8046972; doi:10.1038/s41538-021-00092-5), 2021-04-14
Supplement: 41538_2021_92_MOESM2_ESM.pdf [file 41538_2021_92_MOESM2_ESM.pdf]

1 SUPPLEMENTARY INFORMATION for triplicate isotope analysis of authenticate pineapple juice.

| Sample# | Country/Product type                              | $\delta^2\text{H}\text{‰}$ |             |             | $\delta^{13}\text{C}\text{‰}$ |
|---------|---------------------------------------------------|----------------------------|-------------|-------------|-------------------------------|
|         |                                                   | TFA Fructose               | TFA Glucose | TFA Sucrose |                               |
| 1       | TFA SGF11037-18<br>Costa Rica/single strength     | mean                       | 36.78       | 7.51        | -13.32                        |
|         |                                                   | SD                         | 4.94        | 1.80        | 0.10                          |
|         |                                                   | min                        | 29.61       | 4.66        | -13.43                        |
|         |                                                   | max                        | 42.82       | 9.42        | -13.23                        |
|         |                                                   | mean peak height(nA)       | 0.85        | 4.32        |                               |
| 2       | TFA SGF62060-16<br>Brazil<br>juice concentrate    | mean                       | 2.49        | 24.24       | -13.13                        |
|         |                                                   | SD                         | 4.45        | 1.26        | 0.40                          |
|         |                                                   | min                        | -0.45       | 22.73       | -13.56                        |
|         |                                                   | max                        | 4.39        | 25.57       | -12.76                        |
|         |                                                   | mean peak height(nA)       | 0.54        | 4.31        |                               |
| 3       | TFA SGF36322-18<br>South Africa/juice concentrate | mean                       | 2.70        | 16.00       | -11.29                        |
|         |                                                   | SD                         | 1.17        | 2.79        | 0.05                          |
|         |                                                   | min                        | 1.90        | 14.33       | -11.33                        |
|         |                                                   | max                        | 4.39        | 17.89       | -11.25                        |
|         |                                                   | mean peak height(nA)       | 1.25        | 2.83        |                               |
| 4       | TFA SGF28013-18<br>Thailand/juice concentrate     | mean                       | 4.58        | 10.55       | -13.54                        |
|         |                                                   | SD                         | 3.18        | 0.77        | 0.09                          |
|         |                                                   | min                        | 1.46        | 9.80        | -13.62                        |
|         |                                                   | max                        | 7.53        | 11.40       | -13.45                        |
|         |                                                   | mean peak height(nA)       | 0.96        | 3.20        |                               |
| 5       | TFA SGF62022-17<br>Brazil/juice concentrate       | mean                       | -6.51       | 18.71       | -14.28                        |
|         |                                                   | SD                         | 2.87        | 0.58        | 0.16                          |
|         |                                                   | min                        | -10.01      | 17.98       | -14.45                        |
|         |                                                   | max                        | -3.93       | 19.19       | -14.14                        |
|         |                                                   | mean peak height(nA)       | 0.76        | 4.32        |                               |
| 6       | TFA SGF28005-18<br>Thailand/juice concentrate     | mean                       | 11.17       | 31.24       | -13.67                        |
|         |                                                   | SD                         | 4.51        | 0.84        | 0.07                          |
|         |                                                   | min                        | 4.49        | 30.35       | -13.75                        |
|         |                                                   | max                        | 14.39       | 32.38       | -13.62                        |
|         |                                                   | mean peak height(nA)       | 1.13        | 3.58        |                               |
| 7       | TFA SGF15253-18<br>Indonesia/juice concentrate    | mean                       | 24.45       | 2.61        | -12.81                        |
|         |                                                   | SD                         | 5.85        | 1.61        | 0.29                          |
|         |                                                   | min                        | 15.75       | 0.40        | -13.12                        |
|         |                                                   | max                        | 28.19       | 4.10        | -12.55                        |
|         |                                                   | mean peak height(nA)       | 0.94        | 3.18        |                               |
| 8       | TFA SGF10035-17<br>Kenia/fresh fruit              | mean                       | 35.61       | 16.02       | -11.31                        |
|         |                                                   | SD                         | 2.01        | 2.93        | 0.01                          |
|         |                                                   | min                        | 33.34       | 12.31       | -11.32                        |
|         |                                                   | max                        | 37.66       | 19.51       | -11.29                        |
|         |                                                   | mean peak height(nA)       | 2.07        | 1.62        |                               |
| 9       | TFA SGF11042-16<br>Indonesia/fresh fruit          | mean                       | -2.32       |             | -14.53                        |
|         |                                                   | SD                         | 1.54        | 3.67        |                               |
|         |                                                   | min                        | -4.27       | -18.26      |                               |
|         |                                                   | max                        | -0.36       | -8.44       |                               |
|         |                                                   | mean peak height(nA)       | 1.62        | 0.85        |                               |
| 10      | TFA SGF70117-16<br>Philippines/juice concentrate  | mean                       | -33.79      | -24.98      | -13.37                        |
|         |                                                   | SD                         | 2.25        | 0.65        | 0.08                          |
|         |                                                   | min                        | -35.81      | -25.94      | -13.42                        |
|         |                                                   | max                        | -30.57      | -24.53      | -13.27                        |
|         |                                                   | mean peak height(nA)       | 0.92        | 3.72        |                               |
| 11      | TFA SGF85012-17<br>China/single strength          | mean                       | 0.60        | 12.70       | -13.04                        |
|         |                                                   | SD                         | 1.78        | 1.10        | 0.12                          |
|         |                                                   | min                        | -1.66       | 11.30       | -13.12                        |
|         |                                                   | max                        | 3.05        | 13.95       | -12.96                        |
|         |                                                   | mean peak height(nA)       | 1.39        | 2.77        |                               |
| 12      | TFA SGF78022-17<br>Vietnam/single strength        | mean                       | -16.71      | -4.50       | -14.08                        |
|         |                                                   | SD                         | 0.61        | 0.98        |                               |
|         |                                                   | min                        | -17.37      | -5.59       |                               |
|         |                                                   | max                        | -15.96      | -3.30       |                               |
|         |                                                   | mean peak height (nA)      | 1.06        | 2.97        |                               |
| 13      | TFA SGF70132-17<br>Indonesia/juice concentrate    | mean                       | -25.91      | -9.88       | -12.95                        |
|         |                                                   | SD                         | 1.12        | 1.12        | 0.05                          |
|         |                                                   | min                        | -26.76      | -10.64      | -13.00                        |
|         |                                                   | max                        | -24.64      | -8.59       | -12.92                        |
|         |                                                   | mean peak height (nA)      | 1.28        | 3.91        |                               |
| 14      | TFA SGF78079-17<br>Thailand/juice concentrate     | mean                       | -42.73      | -23.51      | -13.04                        |
|         |                                                   | SD                         | 2.19        | 1.52        | 0.04                          |
|         |                                                   | min                        | -45.24      | -24.95      | -13.09                        |
|         |                                                   | max                        | -39.99      | -21.73      | -13.01                        |
|         |                                                   | mean peak height (nA)      | 1.34        | 3.69        |                               |
| 15      | TFA SGF 28022-18<br>Thailand/juice concentrate    | mean                       | -18.77      | -7.04       | -14.87                        |
|         |                                                   | SD                         | 3.84        | 1.44        |                               |
|         |                                                   | min                        | -23.36      | -8.30       |                               |
|         |                                                   | max                        | -12.91      | -4.87       |                               |
|         |                                                   | mean peak height (nA)      | 0.88        | 3.95        |                               |
| 16      | TFA SGF22115-18<br>Brazil/juice concentrate       | mean                       |             | 14.17       | -14.20                        |
|         |                                                   | SD                         |             | 0.69        | 0.21                          |
|         |                                                   | min                        |             | 13.47       | -14.42                        |
|         |                                                   | max                        |             | 14.86       | -13.99                        |
|         |                                                   | mean peak height (nA)      |             | 4.36        |                               |
| 17      | TFA SGF28017-18<br>Thailand/juice concentrate     | mean                       | -41.85      | -16.87      | -12.87                        |
|         |                                                   | SD                         | 2.20        | 0.21        | 0.04                          |
|         |                                                   | min                        | -44.53      | -17.10      | -13.60                        |
|         |                                                   | max                        | -39.48      | -16.60      | -12.14                        |
|         |                                                   | mean peak height (nA)      | 0.77        | 3.51        |                               |
| 18      | TFA SGF72008-17<br>Brazil/Puree                   | mean                       | -11.05      | -8.13       | -12.64                        |
|         |                                                   | SD                         | 1.48        | 2.16        | 0.28                          |
|         |                                                   | min                        | -12.39      | -9.66       | -12.88                        |
|         |                                                   | max                        | -9.54       | -5.02       | -12.33                        |
|         |                                                   | mean peak height (nA)      | 0.58        | 4.63        |                               |
| 19      | TFA SGF78015-17<br>Thailand/juice concentrate     | mean                       | -37.49      | -18.93      | -13.72                        |
|         |                                                   | SD                         | 1.26        | 0.57        | 0.04                          |
|         |                                                   | min                        | -38.47      | -19.70      | -13.74                        |
|         |                                                   | max                        | -35.71      | -18.40      | -13.69                        |
|         |                                                   | mean peak height (nA)      | 0.98        | 4.03        |                               |
| 20      | TFA SGF78023-16<br>Thailand/juice concentrate     | mean                       | -30.23      | 5.23        | -13.38                        |
|         |                                                   | SD                         | 2.46        | 0.39        | 0.07                          |
|         |                                                   | min                        | -33.83      | 4.87        | -13.46                        |
|         |                                                   | max                        | -28.56      | 5.64        | -13.33                        |
|         |                                                   | mean peak height (nA)      | 0.71        | 3.48        |                               |
| 21      | TFA SGF70176-17<br>Kenia/puree                    | mean                       | 17.87       | 17.32       | -12.52                        |
|         |                                                   | SD                         | 4.77        | 0.63        | 0.02                          |
|         |                                                   | min                        | 12.78       | 16.37       | -12.54                        |
|         |                                                   | max                        | 22.22       | 17.72       | -12.49                        |
|         |                                                   | mean peak height (nA)      | 0.73        | 3.56        |                               |
| 22      | TFA SGF78052-17<br>Thailand/juice concentrate     | mean                       | -50.64      | -39.63      | -13.03                        |
|         |                                                   | SD                         | 1.88        | 1.30        | 0.04                          |
|         |                                                   | min                        | -52.81      | -40.36      | -13.06                        |
|         |                                                   | max                        | -48.77      | -37.70      | -12.98                        |
|         |                                                   | mean peak height (nA)      | 0.89        | 3.40        |                               |
